## 1 **Circulating Metabolites in Progression to Islet Autoimmunity and Type 1 Diabetes**

2 Santosh Lamichhane<sup>1</sup>, Esko Kempainen<sup>1</sup>, Kajetan Trošt<sup>2</sup>, Heli Siljander<sup>3</sup>, Heikki Hyöty<sup>4,5</sup>, Jorma  
3 Ilonen<sup>6,7</sup>, Jorma Toppari<sup>8,9</sup>, Riitta Veijola<sup>10,11,12</sup>, Tuulia Hyötyläinen<sup>13</sup>, Mikael Knip<sup>3,14,15\*</sup>, Matej  
4 Orešič<sup>1,16\*</sup>

5 <sup>1</sup>Turku Centre for Biotechnology, University of Turku and Åbo Akademi University, Turku 20520,  
6 Finland.

7 <sup>2</sup>Steno Diabetes Center Copenhagen, 2820 Gentofte, Denmark

8 <sup>3</sup>Children's Hospital, University of Helsinki and Helsinki University Hospital, 00290 Helsinki,  
9 Finland; Research Program Unit, Diabetes and Obesity, University of Helsinki, 00290 Helsinki,  
10 Finland.

11 <sup>4</sup>Faculty of Medicine and Life Sciences, University of Tampere, Tampere, Finland

12 <sup>5</sup>Fimlab Laboratories, Pirkanmaa Hospital District, Tampere, Finland

13 <sup>6</sup>Immunogenetics Laboratory, Institute of Biomedicine, University of Turku, Turku, Finland

14 <sup>7</sup>Clinical Microbiology, Turku University Hospital, Turku, Finland

15 <sup>8</sup>Institute of Biomedicine, Centre for Integrative Physiology and Pharmacology, University of  
16 Turku, Turku, Finland

17 <sup>9</sup>Department of Pediatrics, Turku University Hospital, Turku, Finland

18 <sup>10</sup>Department of Paediatrics, PEDEGO Research Unit, Medical Research Centre, University of  
19 Oulu, Oulu, Finland

20 <sup>11</sup>Department of Children and Adolescents, Oulu University Hospital, Oulu, Finland

21 <sup>12</sup>Department of Women's and Children's Health, Karolinska Institutet, Stockholm, Sweden

22 <sup>13</sup>Department of Chemistry, Örebro University, 702 81 Örebro, Sweden

23 <sup>14</sup>Tampere Center for Child Health Research, Tampere University Hospital, Tampere, Finland

24 <sup>15</sup>Folkhälsan Research Center, Helsinki, Finland

25 <sup>16</sup>School of Medical Sciences, Örebro University, 702 81 Örebro, Sweden

26

27 \*Corresponding authors:

28 Mikael Knip, M.D., Ph.D.; Children's Hospital, University of Helsinki, P.O.Box 22, FI-00014  
29 Helsinki, Finland. Phone: +358 59 4487722; Email: [mikael.knip@helsinki.fi](mailto:mikael.knip@helsinki.fi)

30 Matej Orešič, Ph.D. Turku Centre for Biotechnology, University of Turku and Åbo Akademi  
31 University, Tykistokatu 6, FI-20520 Turku, Finland. Phone: +358 44 972 6094; Email:  
32 [matej.oresic@utu.fi](mailto:matej.oresic@utu.fi)

33 **Abstract**

34 Previous studies suggest that metabolic dysregulation precedes the onset of type 1 diabetes  
35 (T1D). However, these metabolic disturbances and their specific role in disease initiation remain  
36 poorly understood. Here we analysed polar metabolites from 415 longitudinal plasma samples in a  
37 prospective cohort of children in three study groups: those who progressed to T1D (PT1D), who  
38 seroconverted to one islet autoantibody (Ab) but not to T1D (P1Ab), and Ab-negative controls  
39 (CTR). In early infancy, PT1D associated with downregulated amino acids, sugar derivatives and  
40 fatty acids, including catabolites of microbial origin, as compared to CTR. Methionine remained  
41 persistently upregulated in PT1D as compared to CTR and P1Ab. Appearance of islet  
42 autoantibodies associated with decreased glutamic and aspartic acids. Our findings suggest that  
43 children who progress to T1D have a unique metabolic profile, which is however altered with the  
44 onset of islet autoantibodies. Our findings may assist in early prediction of T1D.

45

46

## 47 **Introduction**

48 Type 1 diabetes (T1D) is an autoimmune disease, which arises due to the destruction of the insulin  
49 producing pancreatic  $\beta$ -cells by the immune system<sup>1</sup>. The incidence of T1D is highest in children  
50 and adolescents in the developed countries<sup>2</sup> and an increase in disease rate is expected in young  
51 children aged less than 5 years<sup>3</sup>. To reverse the increasing rate, early prediction and prevention of  
52 T1D is essential. However, the aetiology of T1D disease is complex, multifactorial, and the  
53 primary cause for initiation and disease progression is poorly understood<sup>1</sup>. Therefore, predictive  
54 and preventive measures for T1D remain unmet medical needs.

55 Human leukocyte antigen (HLA) complex alleles constitute the most relevant and the strongest  
56 genetic risk factor for T1D susceptibility<sup>4</sup>. However, only 3-10% of the individuals with risk HLA  
57 loci develop T1D<sup>5</sup>, indicating that exogenous factors such as environmental exposure, diet and gut  
58 microbiota likely play a vital role in disease progression<sup>6</sup>. Initiation of  $\beta$ -cell autoimmunity is the  
59 first detectable sign of progression towards T1D. However, seroconversion to islet autoantibody  
60 positivity may not lead to overt diabetes<sup>7</sup> and the period between the seroconversion and the  
61 appearance of clinical symptoms of T1D may vary between individuals from a few months to many  
62 years<sup>8,9</sup>.

63 Previous studies suggest that children who progress to T1D have dysregulated metabolic profiles  
64 already in infancy<sup>10, 11, 12, 13</sup>, prior to the seroconversion for islet autoantibodies. However, the  
65 studies in humans have so far mainly focused on lipids, and there is relatively little information  
66 on polar metabolites, such as those involved in central metabolic pathways, in relation to T1D  
67 pathogenesis. Herein we study circulating polar metabolite profiles in progression to T1D in a  
68 longitudinal study setting.

## 69 **Results**

### 70 **Impact of age on circulating metabolome**

71 We performed metabolomics analysis of polar metabolites in plasma from 120 children, divided  
72 into three study groups: those who progressed to T1D (PT1D, n = 40), who seroconverted to at  
73 least one autoantibody (Ab) positivity but without clinical symptoms of T1D (P1Ab, n = 40), and  
74 matched Ab negative controls (CTR, n = 40). For each participant, plasma samples were collected  
75 corresponding to the ages of 3, 6, 12, 18, 24, and 36 months (**Fig. 1**). We detected metabolites from  
76 across a wide range of chemical classes including amino acids, carboxylic acids (mainly free fatty  
77 acids and other organic acids), hydroxyacids, phenolic compounds, alcohols, and sugar  
78 derivatives.

79 Principal components analysis (PCA)<sup>14</sup> of the complete dataset including identified metabolites  
80 displayed an age-dependent pattern (**Supplementary information (SI) Fig.1**). To resolve the  
81 impact of age on plasma metabolome, we performed analysis of variance (ANOVA)-simultaneous  
82 component analysis (ASCA)<sup>15</sup> by incorporating three factors: age, gender, study cases (CTR, P<sub>1</sub>Ab,  
83 PT<sub>1</sub>D) and their interactions. As expected, age related variation displayed maximum effect (4.2 %,   
84  $p = 0.001$ ) in the circulating metabolome as compared to the impact of the other two factors,  
85 ‘study groups’ (1.2 %,  $p = 0.001$ ) and ‘gender’ (0.5 %,  $p = 0.002$ ). Notably, the interaction factor ‘age  
86 and cases’ also showed a significant effect (2.9 %,  $p = 0.033$ ), while interactions between other  
87 factors (age/gender and case/gender) remained insignificant ( $p = 0.508$  and  $p = 0.221$ ,  
88 respectively).

89 The scores from the first principle component (PC<sub>1</sub>) of the factor ‘age’ clearly showed an age-  
90 related trajectory in the circulatory metabolites (**Fig. 2**). The loading revealed high levels of  
91 branched chain amino acids (BCAA) in the 18, 24 and 36 month age-cohorts, whereas tryptophan,  
92 3-indole acetic acid (tryptophan derivative) and carboxylic acids (mainly free fatty acids) were  
93 elevated during early infancy (3 and 6 months). However, we did not detect any age-dependent  
94 patterns in phenolic compounds, alcohols, hydroxyacids, and sugar derivatives (**SI Fig. 2**).

#### 95 **Metabolite profiles during progression to islet autoimmunity and T<sub>1</sub>D**

96 Considering the age as a major confounder in the plasma metabolome, we performed age-  
97 matched comparisons between the three study groups (CTR, P<sub>1</sub>Ab, and PT<sub>1</sub>D). Univariate analysis  
98 revealed that all major metabolite classes, including amino acids, free fatty acids and sugar  
99 derivatives were altered, already in infancy, among the children who later progressed to T<sub>1</sub>D (**Fig.**  
100 **3**). Altogether 15 metabolites were different between PT<sub>1</sub>D and CTR groups at three months of age  
101 (nominal  $p$ -value < 0.05). Nine out of 15 metabolites were significantly lower in T<sub>1</sub>D progressors as  
102 compared to controls (FDR threshold of 0.1) (**Fig. 3, SI Table 1**). In order to assess if gender had  
103 an impact on plasma metabolite levels in children at three months of age, we carried out ASCA  
104 analysis with factor: study cases and gender, and their interaction. When evaluating the statistics  
105 from these factors, we found only study cases had significant effect ( $p = 0.012$ ), while gender and  
106 their interaction remained insignificant ( $p = 0.081$  and  $p = 0.73$ , respectively). The score of the  
107 factor ‘study cases’ showed distinct metabolic clusters between PT<sub>1</sub>D, P<sub>1</sub>Ab and CTR, suggesting  
108 that specific metabolic changes precede islet autoimmunity and T<sub>1</sub>D. The loadings disclosed that  
109 methionine, 2-ketoisocaproic acid, bisphenol A, pyruvic acid, glycerol-2-phosphate, and  
110 levoglucosan were higher in the PT<sub>1</sub>D group when compared with the P<sub>1</sub>Ab and CTR groups (**SI**  
111 **Fig. 3**).

112

113 At 6 months of age, altogether 20 metabolites differed between PT1D and CTR (nominal p-value <  
114 0.05). Fifteen of these circulating metabolites passed the FDR threshold of 0.1 (**Fig. 3a-c, SI Table**  
115 **2**), including several amino acids, sugar derivatives, free fatty acids and various other organic  
116 acids. The levels of most of these metabolites decreased in T1D progressors during the same  
117 period as compared to CTR. Only methionine was found increased in PT1D as compared to CTR  
118 at the age of 6 months. In addition, multivariate ASCA analysis revealed that only study group  
119 (CTR, P1Ab, and PT1D) had a significant effect ( $p = 0.004$ ) in the plasma metabolites of 6-month-  
120 old children, whereas the impact of gender ( $p = 0.180$ ) and its interaction with study group ( $p =$   
121  $0.269$ ) remained insignificant.

122 Next, we sought to examine whether children across the three study groups had altered plasma  
123 metabolite levels in the age cohorts of 12, 18, 24, and 36 months. With the exceptions of 1-  
124 dodecanol and glycolic acid, no other statistically significant differences between the study groups  
125 were observed (FDR threshold of 0.1). At 36 months of age, dodecanol level was higher in PT1D as  
126 compared to CTR. Meanwhile, glycolic acid was lower in PT1D as in P1Ab at 18 months of age.  
127 However, in longitudinal series these metabolites showed inconsistent trends (**Fig. 3b**).

128 We also studied whether group of metabolites at early age associated with a specific metabolic  
129 pathway. The altered metabolites ( $p < 0.05$ ) between CTR and PT1D at 3 and 6 months of age were  
130 subjected to metabolic pathway analysis (MetPA) in MetaboAnalyst<sup>6</sup>. In line with findings at the  
131 individual metabolite levels, we found that four metabolic pathways, linoleic acid metabolism,  
132 arachidonic acid metabolism, alanine, aspartate and glutamate metabolism and D-glutamine and  
133 D-glutamate metabolism remained altered between PT1D and CTR groups at the age of three  
134 months (**Fig. 4a, SI Table 3**). Similarly, at 6 months of age, MetPA revealed that alanine,  
135 aspartate and glutamate metabolism, D-glutamine and D-glutamate metabolism, tryptophan  
136 metabolism, arginine and proline metabolism, as well as aminoacyl-tRNA biosynthesis remained  
137 dysregulated between the controls and T1D progressors (**Fig. 4b, SI Table 4**).

### 138 **Metabolome before and after the first appearance of islet autoantibodies**

139 In order to study the effect of islet seroconversion on metabolome, we compared metabolite levels  
140 before and after the appearance of first islet autoantibody in P1Ab and PT1D groups. Pairwise  
141 comparison revealed that eleven metabolites were altered by seroconversion in P1Ab (nominal p-  
142 value < 0.05, **SI Table 5**), with four passing the FDR threshold of 0.1 (glutamic, aspartic, malic,  
143 and 3, 4-dihydroxybutanoic acids) (**Fig. 4**). We detected seven metabolites altered before and  
144 after islet autoantibody appearance in PT1D (nominal p-value < 0.05), but none of these passed  
145 the FDR threshold of 0.1 (**SI Table 6**). Metabolic pathway analysis corroborated these findings  
146 and revealed that alanine, aspartate and glutamate metabolism were altered when comparing the

147 pathways before and after seroconversion within P<sub>1</sub>Ab and PT<sub>1</sub>D groups (**Fig.4**). However, the  
148 level of impact for these pathways varied between P<sub>1</sub>Ab and PT<sub>1</sub>D, with impact values 0.441 and  
149 0.176, respectively. Other relevant pathways and their impact are summarized in **SI Table 7 and**  
150 **Table 8**. When examining metabolite level changes in relation to the appearance of specific islet  
151 autoantibodies (islet cell antibodies (ICA), insulin autoantibodies (IAA), islet antigen  
152 2 autoantibodies (IA-2A), and GAD autoantibodies (GADA)), no specific associations were  
153 identified, which may be due to the small number of cases per individual autoantibody.

## 154 Discussion

155 Our study identified specific metabolic disturbances in children who progressed to T<sub>1</sub>D, as  
156 compared to their age matched controls including children who developed a single islet  
157 autoantibody but did not progress to T<sub>1</sub>D during the follow-up. We found that such metabolic  
158 dysregulation exists before the first signs of islet autoimmunity. In agreement with earlier  
159 studies<sup>10, 17, 18</sup>, a strong association of the metabolome was observed with age. We identified a  
160 distinct plasma amino acid profile in PT<sub>1</sub>D children, particularly at the ages of 3 and 6 months.  
161 Glutamic and aspartic acids as well as tryptophan remained downregulated during the early  
162 infancy in PT<sub>1</sub>D as compared to CTR, but not to P<sub>1</sub>Ab. In our previous study of polar metabolites  
163 in T<sub>1</sub>D progression, we found no significant difference in different age cohorts when comparing  
164 PT<sub>1</sub>D and CTR groups<sup>13</sup>, which may however be attributable to the small number of individuals in  
165 the metabolomics part of that study. Notably, in agreement with the previous study, we also  
166 observed that the appearance of islet cell autoantibodies was associated with down-regulation of  
167 aspartic and glutamic acids<sup>13</sup>, also corroborated by observed change in alanine, aspartate and  
168 glutamate metabolism in the MetPA. Our findings are consistent with previous study suggesting  
169 that amino acid dysregulation precedes the appearance of islet autoantibodies and progression to  
170 T<sub>1</sub>D<sup>12</sup>. Several free fatty acids were also downregulated at 3 months of age. During basal metabolic  
171 processes, triglycerides (TGs) are broken down to fatty acid and glycerol<sup>19</sup>. Fatty acid act as an  
172 important fuel source for cells, which is required to maintain systematic energy homeostasis<sup>20</sup>.  
173 Usually, under conditions when the availability of carbohydrate is not enough, the fatty acids are  
174 alternative substrate for energy production<sup>21</sup>. Here, fatty acid decrease may be an indication of  
175 increased energy demand in PT<sub>1</sub>D, further substantiated by the diminishment of circulating sugar  
176 derivatives as well as altered linoleic acid metabolism and arachidonic acid metabolism. This is  
177 also in line with our previous report<sup>10</sup> associating downregulated TGs and phospholipids in the  
178 PT<sub>1</sub>D group, supporting the view that altered energy metabolism is involved in the initiation of  
179 the autoimmune process and T<sub>1</sub>D.

180 Accumulating evidence suggests that perturbations in the gut microbial structure are associated  
181 with, and contribute to the pathogenesis of  $\beta$ -cell autoimmunity and to overt T<sub>1</sub>D<sup>22, 23, 24</sup>. Here we

182 found that 4-hydroxyphenyllactic acid<sup>25, 26</sup>, 11-eicosenoic acid<sup>27</sup>, and succinic acid<sup>28</sup>, the  
183 metabolites of potential microbial origin (catabolites), are significantly downregulated at early  
184 age (3 and 6 months) in PT1D. The tryptophan derived microbial catabolite 3-indoleacetic tended  
185 to be also downregulated in PT1D (**SI Fig. 4**). Catabolites generated by the gut microbes are vital  
186 to the intestinal homeostasis<sup>26, 29</sup>, thus it is likely that scarcity of substrates for microbial  
187 catabolism contribute to the dysbiosis associated with progression to T1D.

188 While most of the amino acids were downregulated in PT1D as compared to CTR and P1Ab,  
189 methionine remained persistently upregulated in T1D progressors. This appears to be in  
190 disagreement with previous studies in BABYDIAB and MIDIA cohorts, which showed decreased  
191 level of methionine in autoantibody positive individuals and T1D progressors, respectively<sup>18, 30</sup>.  
192 This discrepancy may however be explained: (1) BABYDIAB study compared children  
193 seroconverting early in life ( $\leq 2$  years) to those who developed autoantibodies at older age, while  
194 (2) MIDIA study highlighted differences, which were mainly linked to the age of the children and  
195 the duration of breastfeeding<sup>30</sup>. We performed similar comparison to that of BABYDIAB in the  
196 current study setting but found no significant differences between the groups compared. The  
197 observed differences suggest disrupted methionine metabolism in PT1D. Methionine can be  
198 salvaged endogenously by protein/homocysteine degradation, polyamine synthesis, or by  
199 transsulfuration pathway<sup>31</sup>, and the disturbances in these pathways could modulate the neonatal  
200 epigenetic processes including the DNA methylation and chromatin remodelling and  
201 consequently influence various immunologic responses<sup>32</sup>.

202 The ASCA multivariate analysis revealed that plasma BPA was upregulated in PT1D group,  
203 although univariate analysis across different age cohorts did not reveal significant changes  
204 between the groups. Studies in experimental model of autoimmune diabetes suggest that  
205 increased BPA exposure is associated with accelerated development of autoimmune diabetes<sup>33, 34</sup>.  
206 However, we consider that at the present stage our findings on the association of BPA and T1D are  
207 still inconclusive, because (1) in our study setting we could not control for the effect of sample  
208 storage on the plasma BPA levels and (2) the levels of BPA were not quantified. Clearly further  
209 studies in clinical settings are merited in order to establish the effect of exposure to BPA and  
210 other environmental toxicants on the progression of T1D or other autoimmune diseases.

211 Taken together, while confirming several earlier findings, the present study highlights the  
212 importance of core metabolic pathways such as amino and fatty acid metabolism in early  
213 pathogenesis of T1D. Metabolites of microbial origin were also found associated with T1D  
214 progression. We also observed that appearance of islet autoantibodies does have an effect on the  
215 amino acid levels, specifically on glutamic and aspartic acids. However, these changes do not  
216 seem to be specifically associated with T1D but are instead a general feature of islet autoimmunity



217 – suggesting that amino acid imbalance may be a contributing factor in the initiation of  
218 autoimmunity<sup>13</sup>. Our study also indicates that the largest metabolic changes associated with T1D  
219 progression occur already in early infancy, then these early metabolic signatures become less  
220 pronounced or even disappear with age, particularly after the initiation of islet autoimmunity.  
221 This may have important implications in the search of early metabolic markers of T1D and for  
222 understanding the disease pathogenesis.

## 223 **Methods**

224 These methods are expanded versions of descriptions in our related work<sup>10</sup>.

### 225 **Study setting**

226 The plasma samples were from the Finnish Type 1 Diabetes Prevention and Prediction Study  
227 (DIPP)<sup>35</sup>. The DIPP study has screened more than 220,000 newborn infants for HLA-conferred  
228 susceptibility to T1D in three university hospitals (Turku, Tampere, and Oulu) in Finland<sup>36</sup>. The  
229 subjects in the current study were from the subset of DIPP children from the Tampere study  
230 centre. The ethics and research committee of the participating university hospital approved the  
231 study protocol and the study followed the guidelines of the Declaration of Helsinki. Parent for all  
232 participants signed written informed consent at the beginning of the study. We collected five  
233 longitudinal samples per child, corresponding to either of the ages of 3, 6, 12, 18, 24, and 36. This  
234 longitudinal cohort comprises of samples from 120 children: 40 progressors to T1D (PT1D), 40 who  
235 tested positive for at least one Ab in a minimum of two consecutive samples but did not progress  
236 to clinical T1D during the follow-up (P1Ab), and 40 controls (CTR) subjects who remained islet  
237 autoantibody negative during the follow-up until the age of 15. We matched the participants in  
238 the three study group for HLA-associated diabetes risk, gender and period of birth. In total, we  
239 collected 415 non-fasting, blood samples. We separated plasma within 30 minutes after the blood  
240 collection by centrifugation at 1600g for 20 minutes at room temperature. The plasma samples  
241 were stored at -80°C until analysed.

### 242 **HLA genotyping**

243 HLA-conferred susceptibility to T1D was analysed using cord blood samples as described by  
244 Nejentsev *et al.*<sup>37</sup>. Briefly, the HLA-genotyping was performed with time-resolved fluorometry  
245 based assay for four alleles using lanthanide chelate labelled sequence specific oligonucleotide  
246 probes detecting DQB1\*02, DQB1\*03:01, DQB1\*03:02, and DQB1\*06:02/3 alleles<sup>38</sup>. The carriers of  
247 the genotype DQB1\*02/DQB1\*03:02 or DQB1\*03:02/x genotypes (here x≠ DQB1\*02, DQB1\*03:01,  
248 DQB1\*06:02, or DQB1\*06:03 alleles) were categorized into the T1D risk group and recruited for  
249 the DIPP follow-up program.



## 250 **Detection of islet autoantibodies**

251 The participants with HLA-conferred genetic susceptibility were prospectively observed for the  
252 appearance of T1D associated autoantibodies (islet cell antibodies (ICA), insulin autoantibodies  
253 (IAA), islet antigen 2 autoantibodies (IA-2A), and GAD autoantibodies (GADA). These  
254 autoantibodies were analysed in the Diabetes Research Laboratory, University of Oulu from the  
255 plasma samples taken at each follow-up visit as described <sup>39</sup>. ICA antibodies were detected with  
256 the use of indirect immunofluorescence, whereas the other three autoantibodies were quantified  
257 with the use of specific radiobinding assays<sup>40</sup>. We used cut-off limits for positivity of 2.5 Juvenile  
258 Diabetes Foundation (JDF) units for ICA, 3.48 relative units (RU) for IAA, 5.36 RU for GADA, and  
259 0.43 RU for IA-2A. The disease sensitivity and specificity of the assay for ICA were 100% and 98%,  
260 respectively, in the fourth round of the international workshops on standardization of the ICA  
261 assay. According to the Diabetes Autoantibody Standardization Program (DASP) and Islet  
262 Autoantibody Standardization Program (IASP) workshop results in 2010–2015, disease sensitivities  
263 for the IAA, GADA and IA-2A radio binding assays were 36–62%, 64–88% and 62–72%,  
264 respectively. The corresponding disease specificities were 94–98%, 94–99% and 93–100%,  
265 respectively.

## 266 **Analysis of polar metabolites**

267 After randomization and blinding, 415 plasma samples were used for extraction. Plasma was  
268 thawed on ice and aliquoted. 30 µl of aliquot was used for analysis of polar metabolites. Extraction  
269 was performed with 400 µl of methanol as previously described <sup>41</sup>. For quality control and  
270 normalization purpose 10 µl of following group-specific internal standard mix was added into  
271 extraction solvent. Internal standard mix was composed of: heptadecanoic acid-d33 (175.36 mg/l),  
272 valine-d8 (35.72 mg/l), succinic acid-d4 (58.54 mg/l) and glutamic acid-d5 (110.43 mg/l). Internal  
273 standards were purchased from Sigma-Aldrich (Steinheim, Germany) and methanol from  
274 Honeywell Riedel de Haën (Seezle, Germany). Samples were vortexed and left to precipitate for 30  
275 min on ice. After protein precipitation, extracts were centrifuged (Eppendorf; 5427R) for 3 min on  
276 10000 rpm. 180 µl of supernatant was transferred into GC vials and stored for further use. Same  
277 procedure was applied for clinic-pooled plasma which was used for quality control and batch  
278 correction. Calibration curves were made from the following standards: Fumaric acid, Aspartic  
279 acid, Succinic acid, Malic acid, Methionine, Tyrosine, Glutamic acid, Phenylalanine, Arachidonic  
280 acid, Isoleucine, 3-Hydroxybutyric acid, Glycine, Threonine, Leucine, Proline, Serine, Valine,  
281 Alanine, Stearic acid, Linoleic acid, Palmitic acid and Oleic acid. Standards were purchased from  
282 Sigma-Aldrich (Steinheim, Germany) and dissolved in methanol. Calibration curves included at  
283 least six concentration points in the range from 1 ng/sample up to 3000 ng/sample, depending on  
284 the abundance in plasma. R<sup>2</sup> was from 97.1% up to 99.9%.

285 Derivatization was performed instrumentally using MPS2 (Gerstel; Mülheim an der Ruhr,  
286 Germany) with two robotic hands guided by Maestro software. Samples were evaporated to  
287 dryness before two-step extractions. In the first step 25 µl of methoxyamine hydrochloride (TS-  
288 45950; Thermo Scientific: USA) was added to the sample. While mixing, the solution was  
289 incubated for one hour at 45 °C. In the second step, 25µl of N-methyl-N-  
290 trimethylsilyltrifluoroacetamide (Sigma-Aldrich; Steinheim, Germany) was added. Incubation was  
291 again performed for one hour at 45 °C. Before injection 50 µl of hexane was added to increase the  
292 volatility of the solvent. Additional standards here added during derivatization. n-alkanes (c = 8  
293 mg/l in MSTFA) were used for calculation of retention indexes and 4,4'-  
294 dibromooctafluorobiphenyl (c = 9.8 mg/l in hexane) were used as syringe standard to control the  
295 quality of injection. 1 µl of derivatized sample was injected after derivatization program was  
296 completed.

297 Derivatized compounds were analysed using Pegasus 4D system (LECO; Saint Joseph; USA).  
298 Method used is based on two-dimensions gas chromatography followed by high speed time of  
299 flight acquisition of EI fragmented mass spectra. Primary column was 10 m × 0.18 mm I.D. Rxi-5  
300 ms (Restek Corp., Bellefonte, PA, USA) and secondary column 1.5 m × 0.1 mm I.D. BPX-50 (SGE  
301 Analytical Science, Austin, TX, USA). System was guarded by retention gap column from  
302 deactivated silica (1.7m, 0.53 mm ID, FS deactivated, Agilent technologies, USA). Modulator used  
303 nitrogen gas which was cryogenically cooled. Second dimension cycle was 4s. Temperature  
304 program started with 50 °C (2 min) then a gradient of 7°C up to 240°C was applied and finally  
305 25°/min to 300 °C where it was held stable for 3 min. Temperature program of secondary column  
306 was maintained 20 °C higher than the primary column. Acquisition rate was kept on 100 Hz.  
307 Instrument was guided by ChromaTOF software (version 4.32; LECO Corporation, St. Joseph,  
308 USA) which was also used calculating area under the peaks with SN>100 and potential  
309 identification of peaks using NIST14 and in-house library. Processing method included calculation  
310 of retention indexes. Selected compounds were quantified against external calibration curves.  
311 Results were exported as text files for further processing with Guineu<sup>42</sup> software.

## 312 **Data analysis**

313 All statistical analyses were performed on log-transformed intensity data. The transformed data  
314 were mean centered and auto scaled prior to multivariate analysis. The multivariate analysis was  
315 done using the PLS Toolbox 8.2.1 (Eigenvector Research Inc., Manson, WA, USA) in MATLAB  
316 2017b (Mathworks, Inc., Natick, MA, USA). PCA was initially performed to highlight trend and to  
317 get an overview of variation in the dataset. ANOVA-simultaneous component analysis (ASCA) a  
318 multivariate extension of ANOVA analysis was performed to allow interpretation of the variation  
319 induced by the different factors including age, sex, case, and their interaction<sup>15</sup>.

320 Wilcoxon rank-sum test was performed for comparing the two study groups of samples (e.g. PT1D  
321 vs. P1Ab) in a specific age cohort. For comparison, one sample per subject, closest to the age  
322 within the time window, has been used in each test. Paired t-test was performed for the matched  
323 groups of samples (e.g. before vs. after seroconversion). The resulting nominal p-values were  
324 corrected for multiple comparisons using Benjamin and Hochberg approach<sup>43</sup>. The adjusted p-  
325 values  $< 0.1$  (q-values) were considered significantly different among the group of hypotheses  
326 tested in a specific age cohort. All of the univariate statistical analyses were computed in  
327 MATLAB 2017b using the statistical toolbox. The fold difference was calculated by dividing the  
328 mean concentration of a lipid species in one group by another, for instance mean concentration  
329 in the PT1D by the mean concentration in P1Ab, and then illustrated by heat maps. The locally  
330 weighted regression plot was made using smoothing interpolation function loess (with span = 1)  
331 available from ggplot2<sup>44</sup> package in R<sup>45</sup>. The individual lipids levels were visualized as box plot  
332 using GraphPad Prism 7 (GraphPad Software, La Jolla, CA, USA).

333 Pathway analysis of the significant metabolites (nominal p-values  $< 0.05$ ) was performed using  
334 metabolomics pathway analysis (MetPA) tool in MetaboAnalyst 4.0<sup>16</sup>. The compounds unmatched  
335 during compound name matching were excluded from the subsequently pathway analysis. We  
336 implemented Globaltest hypergeometric testing method for the functional enrichment analysis.  
337 The pathway topological analysis was based on the relative betweenness measures of a metabolite  
338 in a given metabolic network and for calculating the pathway impact score. Based on the impact  
339 values from the pathway topology analysis the impact value threshold was set to  $> 0.10$ .

340

341 **Data availability**

342 The metabolomics data and the associated meta-data are deposited at the MetaboLights database  
343 <sup>46</sup> with the acquisition number (MTBLS802). All the data supporting the findings of this study  
344 are available from MetaboLights database or from the corresponding authors on reasonable  
345 request.

346 **Acknowledgments**

347 This work was supported by the JDRF grants 4-1998-274, 4-1999-731 4-2001-435 and special  
348 research funds for Oulu, Tampere and Turku University Hospitals in Finland. This work was  
349 supported by the Juvenile Diabetes Research Foundation (2-SRA-2014-159-Q-R to M.O.) and the  
350 Academy of Finland (Centre of Excellence in Molecular Systems Immunology and Physiology  
351 Research – SyMMMyS, Decision No. 250114, to M.O. and M.K.). We thank Olli Simell for his  
352 contribution in the DIPP study, to Anette Untermann for excellent technical support in  
353 metabolomics analysis, and to Alex Dickens and Partho Sen for helpful discussions and insight in  
354 relation to this study.

355 **Author contributions**

356 M.O. and M.K. designed and supervised the study. K.T. and T.H. performed metabolomic  
357 analysis. S.L. and E.K. analysed the data. H.S., H.H., J.I., J.T. and R.V. contributed to the design  
358 and conduct of the clinical study. S.L. and M.O. wrote the manuscript. All authors critically  
359 reviewed and approved the final manuscript.

360 **Competing interests**

361 The authors declare no competing interests.

362 **Ethical approval and informed consent**

363 The ethics and research committee of the participating university and hospital at University of  
364 Tampere, Tampere Finland, approved the study protocol. The study was conducted according to  
365 the guidelines in the Declaration of Helsinki. Written informed consent was signed by the parents  
366 at the beginning of the study for participation of their children enrolled in the study.

367

## 368 References

- 369 1. Atkinson MA, Eisenbarth GS, Michels AW. Type 1 diabetes. *Lancet* **383**, 69-82 (2014).
- 370
- 371 2. Katsarou A, *et al.* Type 1 diabetes mellitus. *Nat Rev Dis Primers* **3**, 17016 (2017).
- 372
- 373 3. Patterson CC, Dahlquist GG, Gyurus E, Green A, Soltesz G. Incidence trends for childhood
- 374 type 1 diabetes in Europe during 1989-2003 and predicted new cases 2005-20: a
- 375 multicentre prospective registration study. *Lancet* **373**, 2027-2033 (2009).
- 376
- 377 4. Noble JA, Erlich HA. Genetics of Type 1 Diabetes. *Cold Spring Harb Perspect Med* **2**, (2012).
- 378
- 379 5. Achenbach P, Bonifacio E, Koczwara K, Ziegler AG. Natural history of type 1 diabetes.
- 380 *Diabetes* **54 Suppl 2**, S25-31 (2005).
- 381
- 382 6. Knip M, Veijola R, Virtanen SM, Hyöty H, Vaarala O, Åkerblom HK. Environmental
- 383 Triggers and Determinants of Type 1 Diabetes. *Diabetes* **54**, S125-S136 (2005).
- 384
- 385 7. Bonifacio E. Predicting Type 1 Diabetes Using Biomarkers. *Diabetes Care* **38**, 989-996
- 386 (2015).
- 387
- 388 8. Ziegler AG, *et al.* Seroconversion to multiple islet autoantibodies and risk of progression to
- 389 diabetes in children. *JAMA* **309**, 2473-2479 (2013).
- 390
- 391 9. Giannopoulou EZ, *et al.* Islet autoantibody phenotypes and incidence in children at
- 392 increased risk for type 1 diabetes. *Diabetologia* **58**, 2317-2323 (2015).
- 393
- 394 10. Lamichhane S, *et al.* Dynamics of Plasma Lipidome in Progression to Islet Autoimmunity
- 395 and Type 1 Diabetes – Type 1 Diabetes Prediction and Prevention Study (DIPP). *Sci Rep* **8**,
- 396 10635 (2018).
- 397
- 398 11. La Torre D, *et al.* Decreased Cord-Blood Phospholipids in Young Age-at-Onset Type 1
- 399 Diabetes. *Diabetes* **62**, 3951-3956 (2013).
- 400
- 401 12. la Marca G, Malvagia S, Toni S, Piccini B, Di Ciommo V, Bottazzo GF. Children who
- 402 develop type 1 diabetes early in life show low levels of carnitine and amino acids at birth:
- 403 does this finding shed light on the etiopathogenesis of the disease? *Nutr Diabetes* **3**, e94
- 404 (2013).
- 405
- 406 13. Oresic M, *et al.* Dysregulation of lipid and amino acid metabolism precedes islet
- 407 autoimmunity in children who later progress to type 1 diabetes. *J Exp Med* **205**, 2975-2984
- 408 (2008).
- 409
- 410 14. Bro R, Smilde AK. Principal component analysis. *Anal Methods* **6**, 2812-2831 (2014).

- 411  
412 15. Smilde AK, Jansen JJ, Hoefsloot HC, Lamers RJ, van der Greef J, Timmerman ME. ANOVA-  
413 simultaneous component analysis (ASCA): a new tool for analyzing designed  
414 metabolomics data. *Bioinformatics* **21**, 3043-3048 (2005).
- 415  
416 16. Chong J, *et al.* MetaboAnalyst 4.0: towards more transparent and integrative  
417 metabolomics analysis. *Nucleic Acids Res* **46**, W486-W494 (2018).
- 418  
419 17. Rist MJ, *et al.* Metabolite patterns predicting sex and age in participants of the Karlsruhe  
420 Metabolomics and Nutrition (KarMeN) study. *PLoS One* **12**, e0183228 (2017).
- 421  
422 18. Pflueger M, *et al.* Age- and islet autoimmunity-associated differences in amino acid and  
423 lipid metabolites in children at risk for type 1 diabetes. *Diabetes* **60**, 2740-2747 (2011).
- 424  
425 19. Wakil SJ, Abu-Elheiga LA. Fatty acid metabolism: target for metabolic syndrome. *J Lipid*  
426 *Res* **50 Suppl**, S138-143 (2009).
- 427  
428 20. Currie E, Schulze A, Zechner R, Walther TC, Farese RV, Jr. Cellular fatty acid metabolism  
429 and cancer. *Cell Metab* **18**, 153-161 (2013).
- 430  
431 21. Randle PJ, Newsholme EA, Garland PB. Regulation of glucose uptake by muscle. 8. Effects  
432 of fatty acids, ketone bodies and pyruvate, and of alloxan-diabetes and starvation, on the  
433 uptake and metabolic fate of glucose in rat heart and diaphragm muscles. *Biochem J* **93**,  
434 652-665 (1964).
- 435  
436 22. Kostic AD, *et al.* The dynamics of the human infant gut microbiome in development and  
437 in progression toward type 1 diabetes. *Cell Host Microbe* **17**, 260-273 (2015).
- 438  
439 23. Vatanen T, *et al.* Variation in Microbiome LPS Immunogenicity Contributes to  
440 Autoimmunity in Humans. *Cell* **165**, 842-853 (2016).
- 441  
442 24. Knip M, Siljander H. The role of the intestinal microbiota in type 1 diabetes mellitus. *Nat*  
443 *Rev Endocrinol* **12**, 154-167 (2016).
- 444  
445 25. Mu W, Yang Y, Jia J, Zhang T, Jiang B. Production of 4-hydroxyphenyllactic acid by  
446 *Lactobacillus* sp. SK007 fermentation. *J Biosci Bioeng* **109**, 369-371 (2010).
- 447  
448 26. Van der Meulen R, Camu N, Van Vooren T, Heymans C, De Vuyst L. In vitro kinetic  
449 analysis of carbohydrate and aromatic amino acid metabolism of different members of the  
450 human colon. *Int J Food Microbiol* **124**, 27-33 (2008).
- 451  
452 27. Ktsoyan ZA, *et al.* Profiles of Microbial Fatty Acids in the Human Metabolome are Disease-  
453 Specific. *Front Microbiol* **1**, 148 (2010).
- 454

- 455 28. Sharon G, Garg N, Debelius J, Knight R, Dorrestein PC, Mazmanian SK. Specialized  
456 metabolites from the microbiome in health and disease. *Cell Metab* **20**, 719-730 (2014).
- 457
- 458 29. Roager HM, Licht TR. Microbial tryptophan catabolites in health and disease. *Nat*  
459 *Commun* **9**, 3294 (2018).
- 460
- 461 30. Jørgenrud B, *et al.* Longitudinal plasma metabolic profiles, infant feeding, and islet  
462 autoimmunity in the MIDIA study. *Pediatr Diabetes* **18**, 111-119 (2017).
- 463
- 464 31. Troen AM, Lutgens E, Smith DE, Rosenberg IH, Selhub J. The atherogenic effect of excess  
465 methionine intake. *Proc Natl Acad Sci U S A* **100**, 15089-15094 (2003).
- 466
- 467 32. Hewagama A, Richardson B. The genetics and epigenetics of autoimmune diseases. *J*  
468 *Autoimmun* **33**, 3-11 (2009).
- 469
- 470 33. Bodin J, *et al.* Exposure to bisphenol A, but not phthalates, increases spontaneous diabetes  
471 type 1 development in NOD mice. *Toxicol Rep* **2**, 99-110 (2015).
- 472
- 473 34. Bodin J, Bolling AK, Becher R, Kuper F, Lovik M, Nygaard UC. Transmaternal bisphenol A  
474 exposure accelerates diabetes type 1 development in NOD mice. *Toxicol Sci* **137**, 311-323  
475 (2014).
- 476
- 477 35. Kupila A, *et al.* Feasibility of genetic and immunological prediction of type I diabetes in a  
478 population-based birth cohort. *Diabetologia* **44**, 290-297 (2001).
- 479
- 480 36. Haller MJ, Schatz DA. The DIPP project: 20 years of discovery in type 1 diabetes. *Pediatr*  
481 *Diabetes* **17 Suppl 22**, 5-7 (2016).
- 482
- 483 37. Nejentsev S, *et al.* Population-based genetic screening for the estimation of Type 1 diabetes  
484 mellitus risk in Finland: selective genotyping of markers in the HLA-DQB1, HLA-DQA1  
485 and HLA-DRB1 loci. *Diabet Med* **16**, 985-992 (1999).
- 486
- 487 38. Ilonen J, *et al.* Rapid HLA-DQB1 genotyping for four alleles in the assessment of risk for  
488 IDDM in the Finnish population. The Childhood Diabetes in Finland (DiMe) Study Group.  
489 *Diabetes Care* **19**, 795-800 (1996).
- 490
- 491 39. Siljander HT, *et al.* Predictive characteristics of diabetes-associated autoantibodies among  
492 children with HLA-conferred disease susceptibility in the general population. *Diabetes* **58**,  
493 2835-2842 (2009).
- 494
- 495 40. Knip M, *et al.* Dietary intervention in infancy and later signs of beta-cell autoimmunity. *N*  
496 *Engl J Med* **363**, 1900-1908 (2010).
- 497



- 498 41. Hartonen M, Mattila I, Ruskeepää A-L, Oresic M, Hyotylainen T. Characterization of  
499 cerebrospinal fluid by comprehensive two-dimensional gas chromatography coupled to  
500 time-of-flight mass spectrometry. *J Chromatogr A* **1293**, 142-149 (2013).
- 501  
502 42. Castillo S, Mattila I, Miettinen J, Oresic M, Hyotylainen T. Data analysis tool for  
503 comprehensive two-dimensional gas chromatography/time-of-flight mass spectrometry.  
504 *Anal Chem* **83**, 3058-3067 (2011).
- 505  
506 43. Benjamini Y, Hochberg Y. Controlling the false discovery rate: a practical and powerful  
507 approach to multiple testing. *J R Stat Soc Ser B Methodol* **57**, (1995).
- 508  
509 44. Wickham H. ggplot2: Elegant graphics for data analysis *Springer-Verlag New York*, (2016).
- 510  
511 45. R Core Team R: A Language and Environment for Statistical Computing. *R Foundation for*  
512 *Statistical Computing: Vienna, Austria*, (2014).
- 513  
514 46. Kale NS, *et al.* MetaboLights: an open-access database repository for metabolomics data.  
515 *Curr Protoc Bioinformatics* **53**, 14.13.11-18 (2016).
- 516  
517  
518

## 519 Figure captions

520 **Figure 1.** An overview of the study design. The study cohort comprises the samples from children,  
521 who progressed to T1D (PT1D), who seroconverted to one islet autoantibody but did not progress  
522 to T1D during the follow-up (P1Ab), and control (CTR) subjects who remained islet autoantibody  
523 negative during the follow-up until the age of 15 years. For each child, longitudinal plasma  
524 samples were drawn, corresponding to the ages of 3, 6, 12, 18, 24, and 36 months. In each age  
525 cohort and study group, number of autoantibody positive children is marked and represented  
526 with Y-shape.

527 **Figure 2.** PCA score plots of the factor age, based on ASCA. These scores represent the  
528 metabolomics dataset arranged according to the age in the PCA score plot. Each sample is  
529 represented by a point and coloured according to the age. The ages of the participants are marked  
530 on the x-axis while y-axis represents the sample score. Samples with similar score cluster  
531 together.

532 **Figure 3.** Comparison of metabolomes in three study groups in different age cohorts. (a) Heat  
533 map showing 43 metabolites representative of different metabolic classes that change between  
534 PT1D, P1Ab and CTR. Differences in metabolite concentrations were calculated by dividing mean  
535 concentration in PT1D by the mean concentrations in P1Ab and CTR. (b) The *loess* curve plot of  
536 methionine concentration in time for the three study groups. (c) Concentration of 4-  
537 hydroxyphenyllactic acid at 6 months of age. (d) Concentration of Glutamic acid at 6 months of  
538 age.  $\chi$  represents the adjusted p-values  $< 0.1$ .

539 **Figure 4.** Pathway analysis of significantly different metabolites between CTR and PT1D at (a) 3  
540 and (b) 6 months of age. The pathways are shown according to the p values from the pathway  
541 enrichment analysis and pathway impact values from the pathway topology analysis. The  
542 metabolic pathways with impact value  $> 0.1$  were considered the most relevant pathways involved.  
543 Pathway impact values were calculated from pathway topology analysis using MetaboAnalyst.

544 **Figure 5.** The effect of islet autoantibody positivity on metabolite profiles. (a) The most  
545 discriminating metabolites between the last available samples obtained before the first islet  
546 autoantibody appeared and the first available samples after the emergence of the first islet  
547 autoantibody, in P1Ab and PT1D groups. The pairwise scatter plot of (b) aspartic and (c) glutamic  
548 acid before and after the first appearance of islet autoantibodies. Pathway analysis of differentially  
549 expressed metabolites between (d) B-P1Ab & A-P1Ab, and (e) B-PT1D & A-PT1D. Top pathways  
550 identified include Alanine, aspartate and glutamate metabolism. Abbreviations: Before

551 seroconversion in P<sub>1</sub>Ab (B-P<sub>1</sub>Ab), after seroconversion in P<sub>1</sub>Ab (A-P<sub>1</sub>Ab), before seroconversion in  
552 progressors (B-PT<sub>1</sub>D), after seroconversion in progressors (A-PT<sub>1</sub>D).

**FIGURE 1**

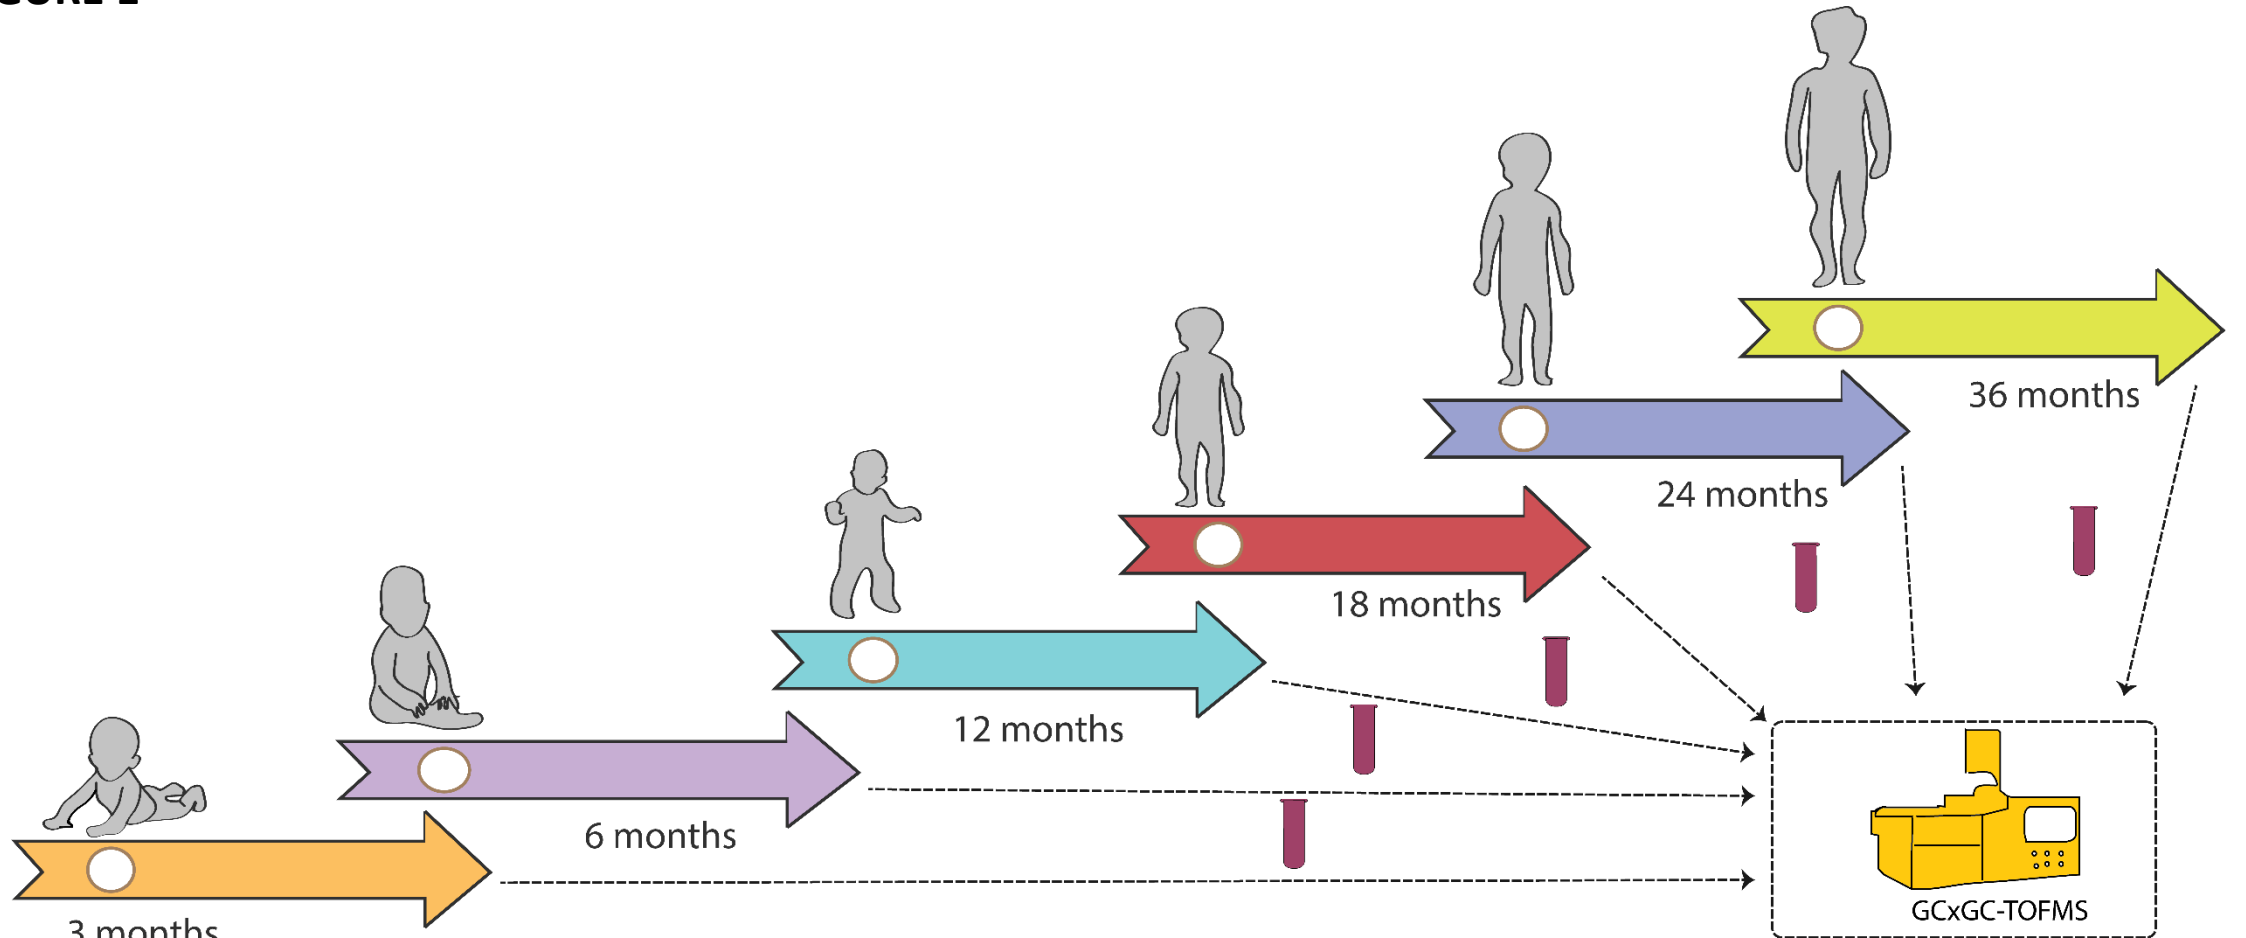

|      | n  | Y |      | n  | Y |      | n  | Y |      | n  | Y  |      | n  | Y  |
|------|----|---|------|----|---|------|----|---|------|----|----|------|----|----|
| CTR  | 18 | 0 | CTR  | 28 | 0 | CTR  | 26 | 0 | CTR  | 21 | 0  | CTR  | 25 | 0  |
| P1Ab | 17 | 0 | P1Ab | 24 | 4 | P1Ab | 26 | 5 | P1Ab | 23 | 14 | P1Ab | 25 | 20 |
| PT1D | 11 | 0 | PT1D | 20 | 0 | PT1D | 23 | 8 | PT1D | 22 | 22 | PT1D | 25 | 25 |

**FIGURE 2**

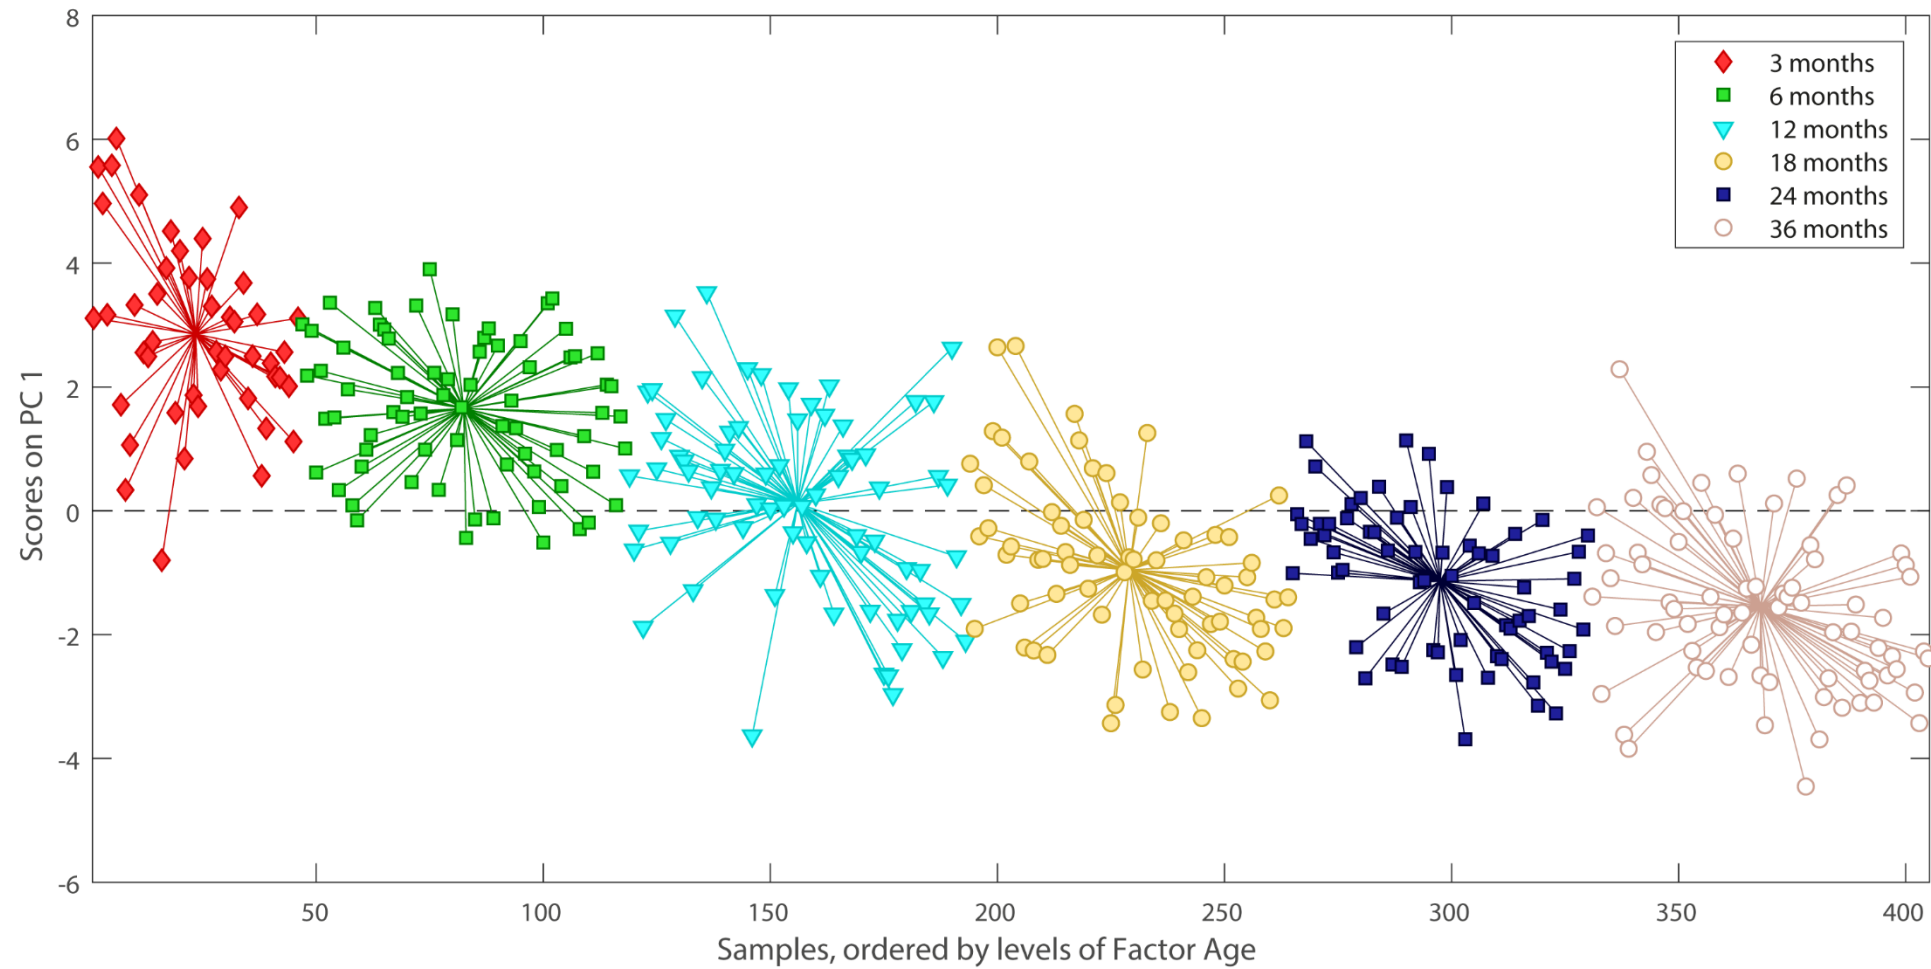

**FIGURE 3**

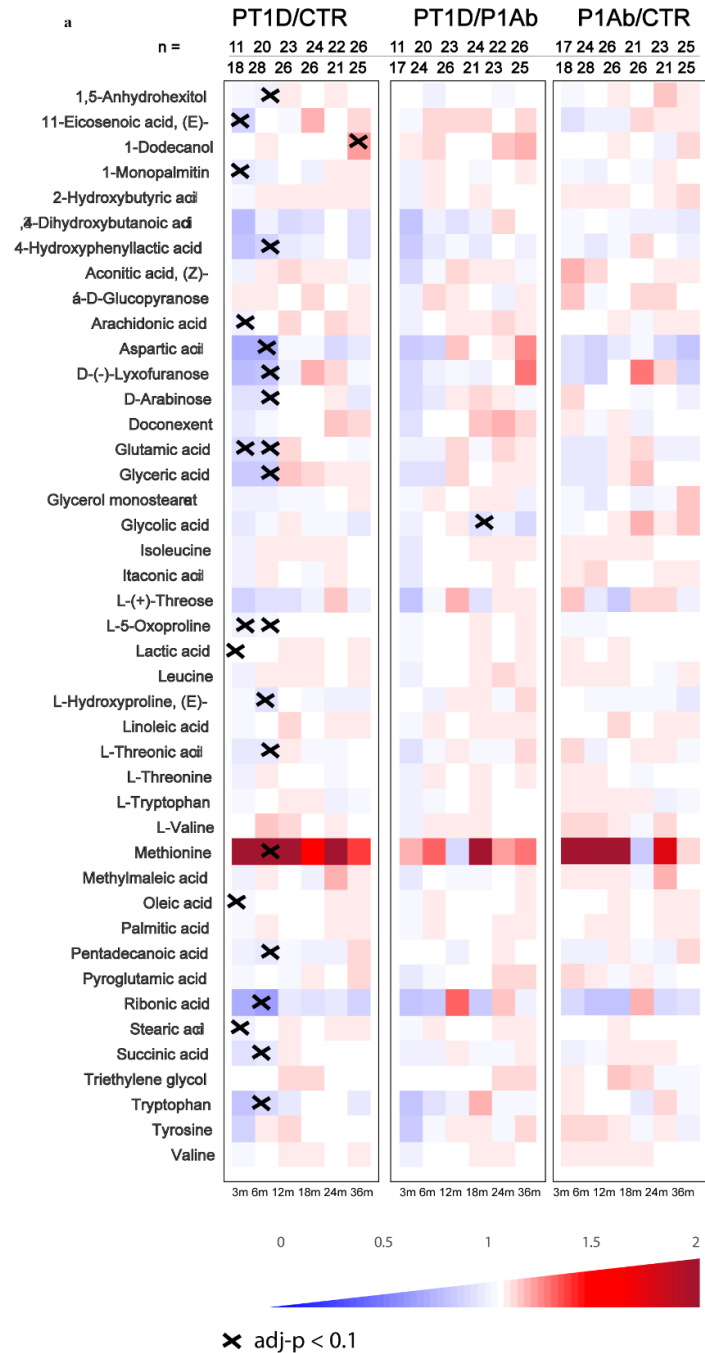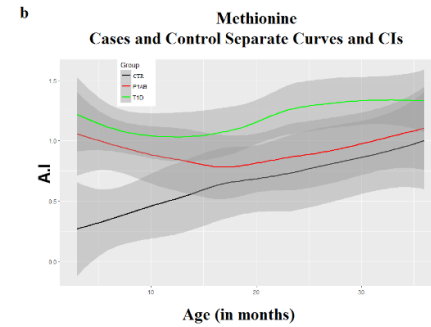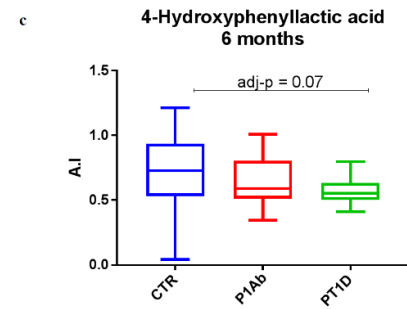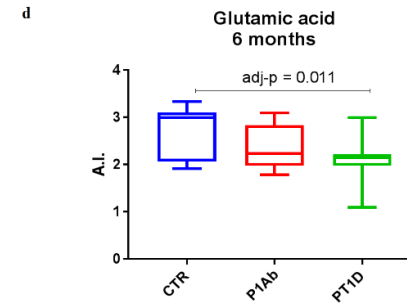

**FIGURE 4**

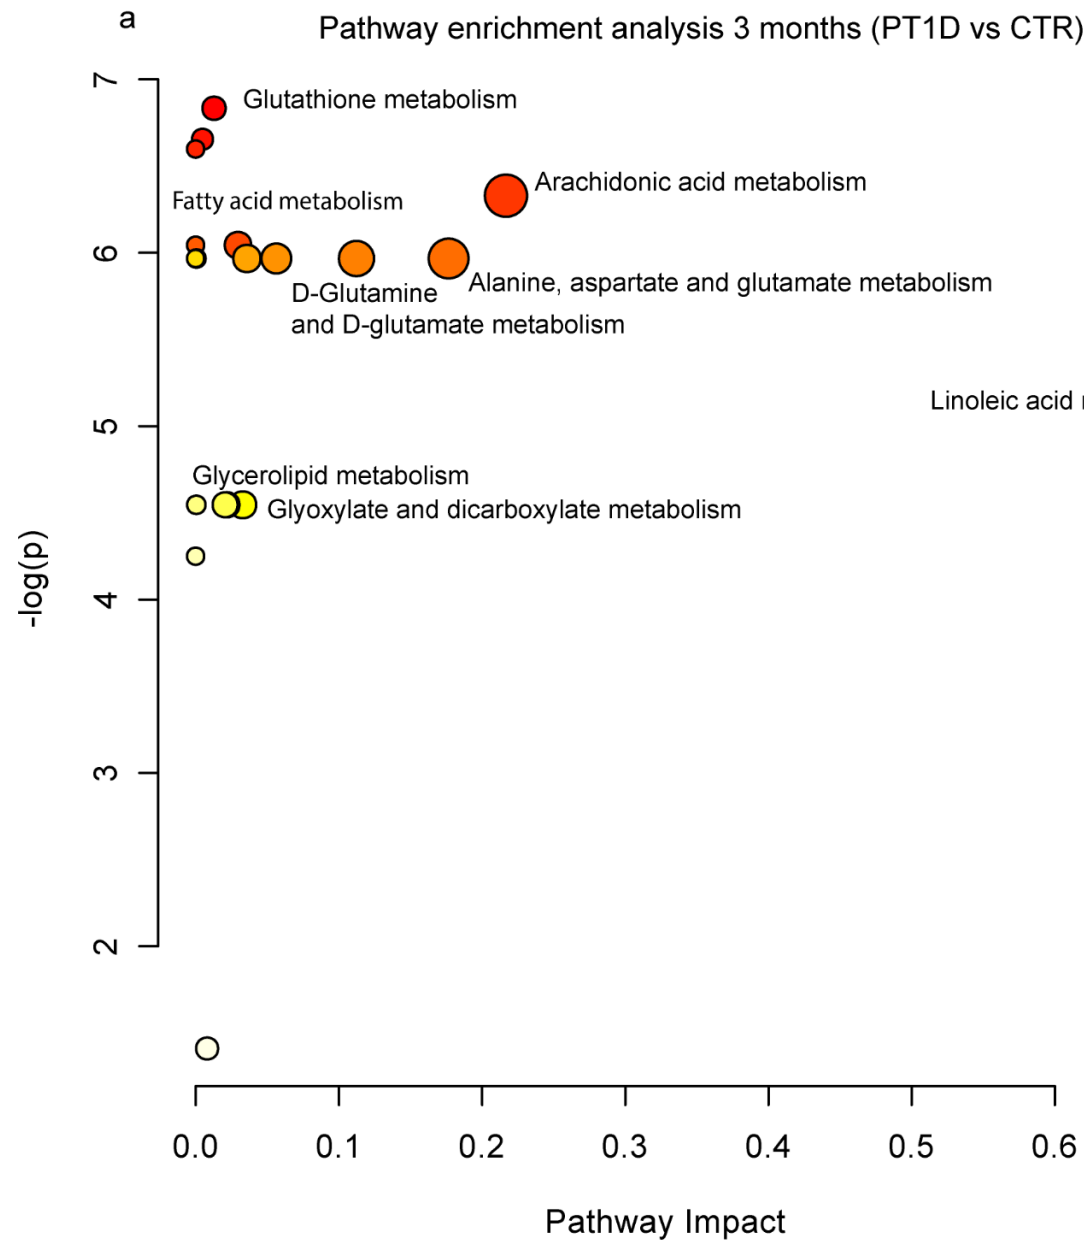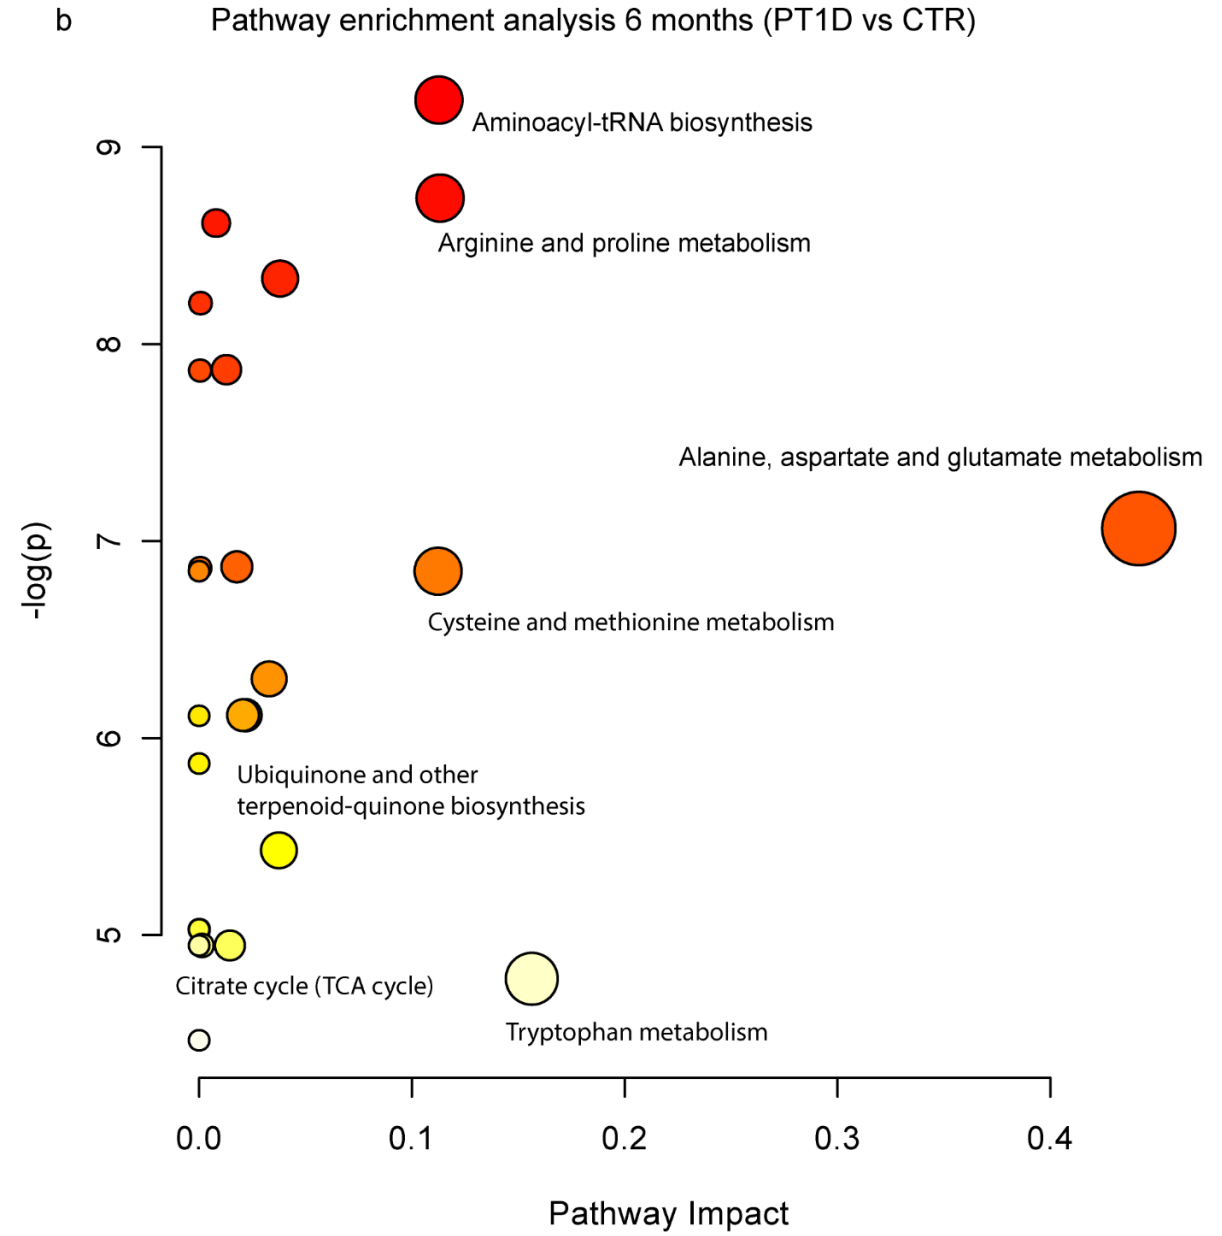



**FIGURE 5**

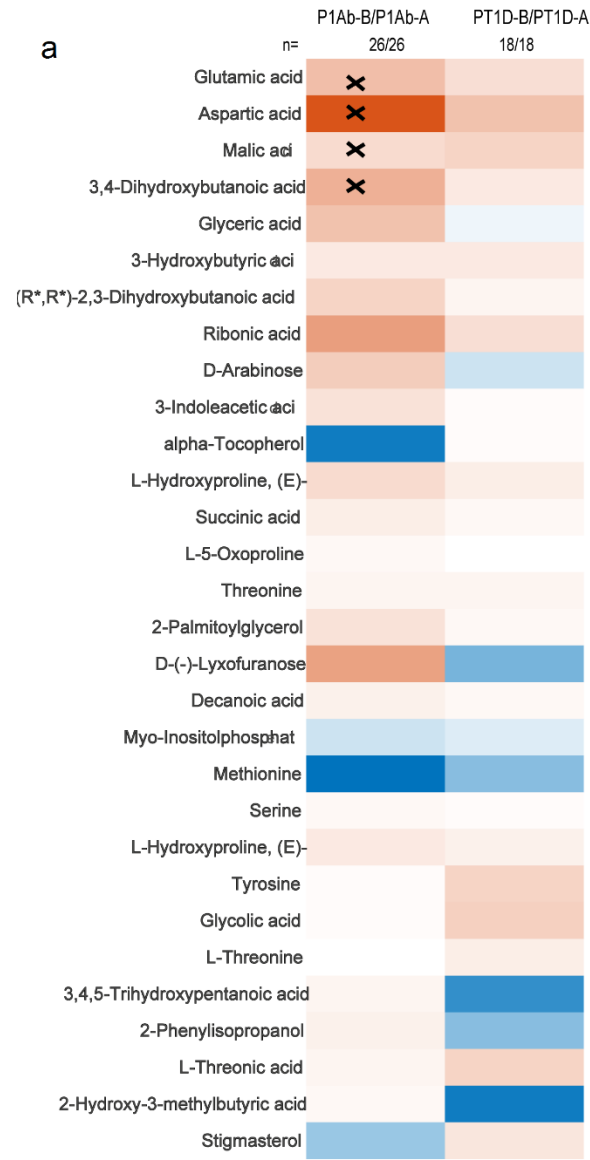

× adj.p-value < 0.1

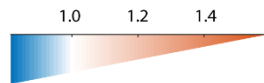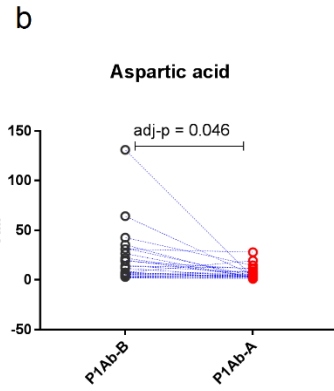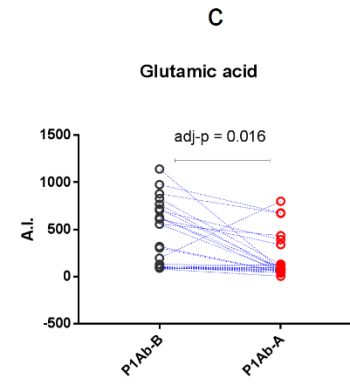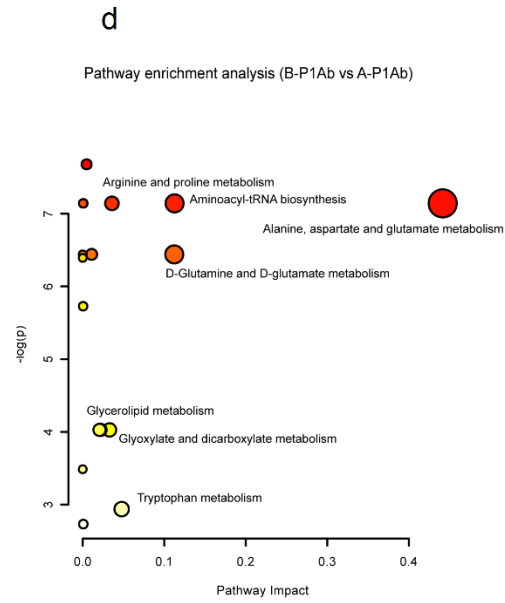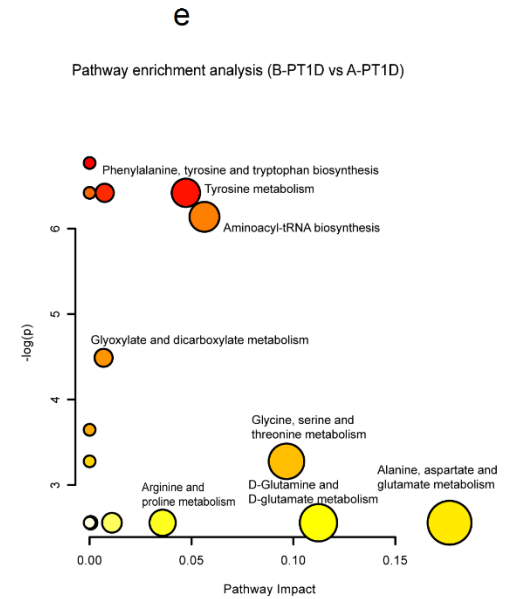

Source: http://biorxiv.org/content/10.1101/496943v1.full.pdf
